# Supplementary material
Source: PubMed Central journal article supplement (PMC4398023)
Supplement: NIHMS396195-supplement-Supplement1.pdf [file NIHMS396195-supplement-Supplement1.pdf]

## Supplementary Appendix

This appendix has been provided by the authors to give readers additional information about their work.

Supplement to: Inker LA, Schmid CH, Tighiouart H, et al. Estimating glomerular filtration rate from serum creatinine and cystatin C. *N Engl J Med* 2012;367:20-9. DOI: 10.1056/NEJMoa1114248.

## Table of contents

|                         | <b>Page</b> |
|-------------------------|-------------|
| List of collaborators   | <b>2</b>    |
| Methods                 | <b>3</b>    |
| Figure S1               | <b>5</b>    |
| Figure S2               | <b>6</b>    |
| Table S1a               | <b>7</b>    |
| Table S1b               | <b>9</b>    |
| Table S2                | <b>10</b>   |
| Table S3                | <b>11</b>   |
| Table S4                | <b>12</b>   |
| Table S5                | <b>14</b>   |
| Table S6                | <b>15</b>   |
| Table S7                | <b>17</b>   |
| Table S8                | <b>18</b>   |
| Table S9                | <b>20</b>   |
| Table S10               | <b>21</b>   |
| Table S11               | <b>22</b>   |
| Table S12:              | <b>23</b>   |
| Table S13               | <b>24</b>   |
| Supplemental References | <b>25</b>   |

## **Acknowledgements**

In addition to the authors, the following were collaborators and provided data: *African American Study of Kidney Disease and Hypertension (AASK)* - Gabriel Contreras, MD MPH, Julia B. Lewis, MD; *Captopril in Diabetic Nephropathy Study (CSG)* - Roger A. Rodby, MD, Richard D. Rohde, BS; *Chronic Renal Insufficiency Cohort (CRIC)* - Harold I. Feldman, MD MSCE, Lawrence J. Appel, MD MPH, Jing Chen, MD MS, Alan S. Go, MD, Lee Hamm, MD, Chi-yuan Hsu, MD, James P. Lash, MD, Akinlolu O. Ojo, MD, Mahboob Rahman, MD, Raymond R. Townsend, MD, Matthew R. Weir, MD, Jackson T. Wright, MD; Cleveland Clinic Foundation (CCF)- Phillip Hall, MD, Emilio Poggio, MD; *Consortium for Radiologic Imaging Studies of Polycystic Kidney Disease (CRISP)*-Vicente Torres, MD PhD; *Diabetes Control and Complications Trial (DCCT)*- Saul Genuth, MD, Michael W. Steffes, MD PhD; *Groningen Renal Hemodynamic Cohort Study Group (GRECO)*- Gerjan Navis, MD PhD; *International Diabetic Nephropathy Study Group (IDNSG) and the Renin-Angiotensin System Study (RASS)*-Michael Mauer, MD; Departments of Clinical Chemistry and Nephrology, University hospital, Lund, Sweden- Anders Grubb, MD PhD, Omran Bakoush, MD PhD; *Mayo Clinic*- Andrew D. Rule, MD MS, Timothy Larson, MD, Fernando Cosio, MD; *Modification of Diet in Renal Disease (MDRD) Study*- Gerald Beck, PhD; *NephroTest Cohort*: Jerome Rossert, MD PhD, Marc Froissart, MD PhD ;; *Steno Diabetes Center*- Hans-Henrik Parving, MD PhD, Peter Rossing, MD DMSc

*Scientific Advisory Committee for CKD-EPI*: Allan Collins, MD FACP, University of Minnesota, Minneapolis, MN; Gary Curhan, MD ScD, Brigham and Women's Hospital, Boston, MA; Ralph D'Agostino, PhD, Boston University, Boston, MA; John Eckfeldt, MD PhD, University of Minnesota, Minneapolis, MN; Adeera Levin, MD FRCP(C), University of British Columbia, Vancouver, BC

## Supplemental Methods

### Hypothesis

We hypothesized that equations developed in a diverse dataset would be less biased than our prior equations developed in CKD populations<sup>1,2</sup>, especially at higher GFR, and that an equation using creatinine and cystatin C together would be more precise than equations using either filtration marker alone.

### Detailed Methods for Equation Development and Validation

*Analyses in the development dataset.* As in previous work, we pre-specified a process for developing equations using transformations of continuous variables and inclusion of categorical variables and interactions among all variables to develop a number of candidate equations<sup>3</sup>. The base models were developed using least squares linear regression to relate log transformed measured GFR to log serum creatinine and/or log cystatin C, age, and sex. We also used nonparametric smoothing splines to characterize the shape of the relationship of log measured GFR with log creatinine and log cystatin C. We then approximated the smoothing splines by piecewise linear splines to represent observed non-linearity. Other candidate variables included the other filtration marker, race (black vs. white and other), diabetes (yes/no) and weight. Black race and diabetes status were ascertained in the original studies<sup>4-14</sup>. These additional variables as well as pair-wise interactions among all variables were included if they were significant at a p-value of <0.01 for additional variables and <0.001 for interactions. Models that demonstrated improved model performance [relative reduction in root mean square error (RMSE) by 2% or more overall and 5% in pre-specified subgroups of estimated GFR, age, sex, race, body mass index (BMI) and diabetes] were brought forward into internal validation. We examined

heterogeneity among studies by cross-validation, comparing coefficients for Black and diabetes within each study that included such patients, and examination of relative performance of the equations among studies. We also evaluated performance by level of proteinuria in the subset of studies with available data.

*Analyses in the internal validation dataset.* We verified the statistical significance of predictor variables and interactions in all models<sup>3</sup>. Models that met these criteria were brought forward into external validation. Development and internal validation datasets were combined into one dataset (called “development dataset” hereafter) to derive final coefficients for each model.

*Analyses in the external validation dataset.* As in our prior work, we used a pre-specified process to compare performance of the multiple models developed in the development dataset to each other as well as to the CKD-EPI creatinine equation<sup>3</sup>, and to our prior equations using cystatin C developed in CKD populations re-expressed for standardized cystatin C values<sup>1,2</sup> (Table S3). We also compared the predictions from the creatinine-cystatin C equation to those calculated from the average of the CKD-EPI creatinine equation and cystatin C equation. We compared performance of equations in the overall dataset and in the subgroups described above, and final models were selected based on the combination of ranking of RMSE overall and within subgroups, clinically significant differences, as well as ease of application in clinical practice.<sup>3</sup> For all steps, sensitivity analyses evaluated robustness of results across studies.

**Figure S1: Distribution of difference and percent difference between measured and estimated GFR.** Top panel: Difference between measured and estimated GFR. Solid lines indicate median difference (median bias) and dashed lines indicate 25<sup>th</sup> and 75<sup>th</sup> percentile for the difference (interquartile range). Bottom panel: Percent difference between measured and estimated GFR. Distance between the black dashed lines indicate the proportion that fall within 30% of measured GFR ( $P_{30}$ ) and distance between the gray dashed lines indicate the proportion that fall within 20% of measured GFR ( $P_{20}$ ).  $1-P_{30}$  and  $1-P_{20}$  represent the proportion with errors larger than 30% and 20%, respectively.

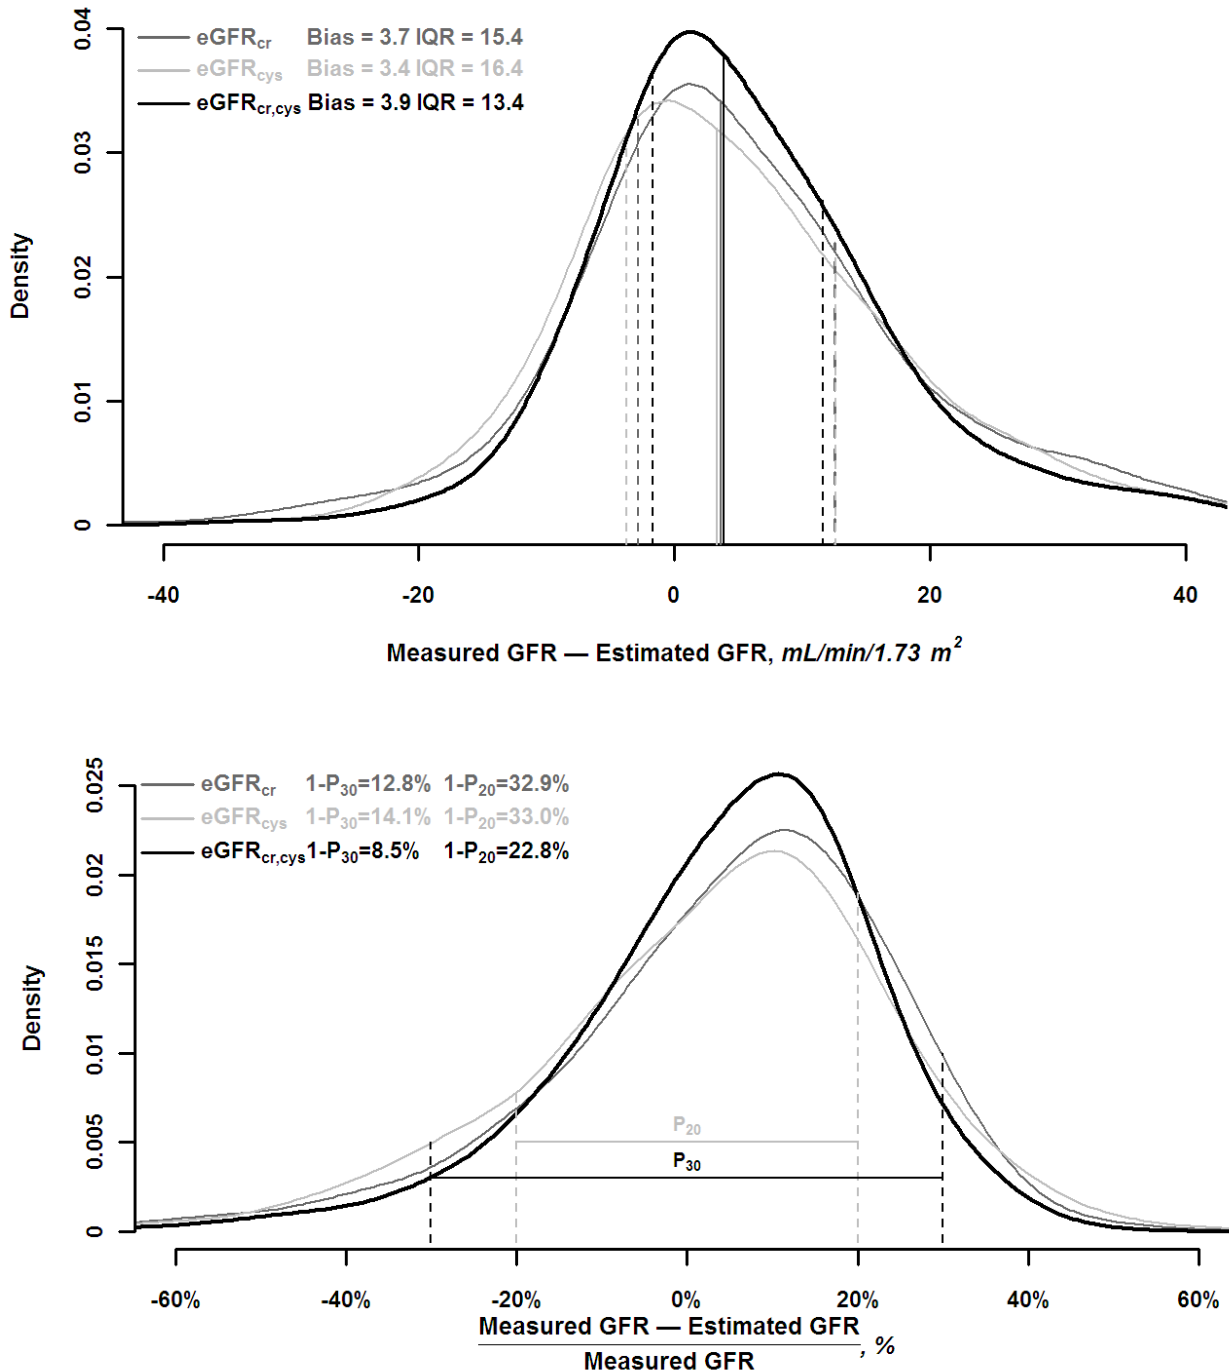

**Figure S2: Performance of estimating equations by clinical subgroups.** Top panel Bias: Median difference between measured and estimated GFR; Bottom panel: Accuracy: Percentage of estimates greater than 30% of measured GFR ( $1 - P_{30}$ )

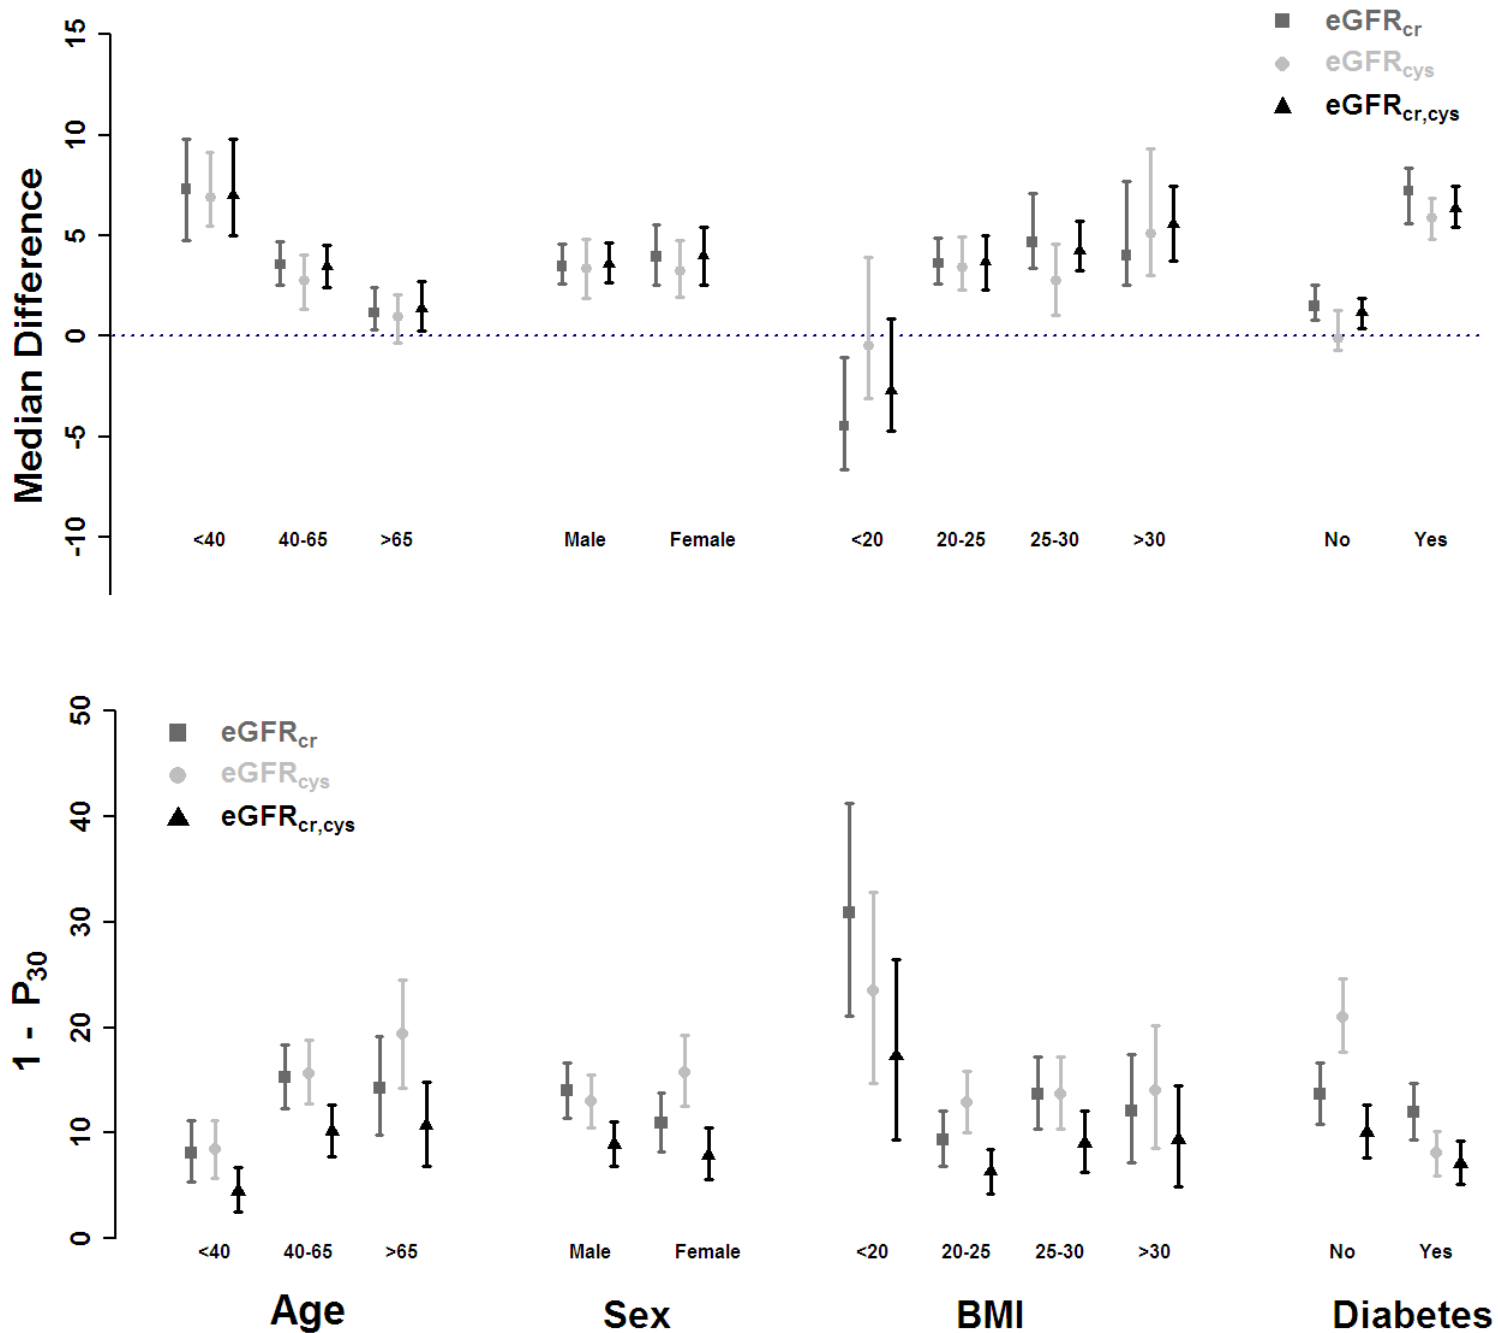

**Table S1a. Category 1: Studies and Participant Characteristics**

| Name                                         | MDRD Study <sup>4</sup> | AASK <sup>5</sup> | DCCT <sup>6</sup> | CSG <sup>7</sup> | CRIC <sup>8</sup> | CCFP         | CCFP Donor  |
|----------------------------------------------|-------------------------|-------------------|-------------------|------------------|-------------------|--------------|-------------|
| <b>Study Characteristics</b>                 |                         |                   |                   |                  |                   |              |             |
| Type                                         | RS                      | RS                | RS                | RS               | RS                | CP           | CP          |
| Center                                       | MC                      | MC                | MC                | MC               | MC                | SC           | SC          |
| N                                            | 1046                    | 1647              | 985               | 285              | 653               | 88           | 96          |
| Filtration Marker                            | Iothalamate             | Iothalamate       | Iothalamate       | Iothalamate      | Iothalamate       | Iothalamate  | Iothalamate |
| Dates                                        | 1989-1992               | 1995-1998         | 1987-1989         | 1987-1992        | 2003-2005         | 1996-2003    | 1996-2003   |
| <b>Clinical Characteristics</b>              |                         |                   |                   |                  |                   |              |             |
| Age (years), mean (SD)                       | 52 (13)                 | 54 (10)           | 29 (6)            | 34 (8)           | 55 (14)           | 54 (13)      | 43 (12)     |
| Age categories, N (%)                        |                         |                   |                   |                  |                   |              |             |
| <40                                          | 215 (21)                | 168 (10)          | 985 (100)         | 210 (74)         | 115 (18)          | 12 (14)      | 38 (40)     |
| 40-65                                        | 660 (63)                | 1211 (74)         | 0 (0)             | 75 (26)          | 345 (53)          | 58 (66)      | 57 (59)     |
| >65                                          | 171 (16)                | 268 (16)          | 0 (0)             | 0 (0)            | 193 (30)          | 18 (20)      | 1 (1)       |
| Sex (Female), N (%)                          | 408 (39)                | 592 (36)          | 450 (46)          | 126 (44)         | 301 (46)          | 33 (38)      | 48 (50)     |
| Blacks, N (%)                                | 102 (10)                | 1647 (100)        | 27 (3)            | 23 (8)           | 283 (43)          | 7 (8)        | 10 (10)     |
| Diabetes, N (%)                              | 60 (6)                  | 0 (0)             | 985 (100)         | 285 (100)        | 294 (45)          | 18 (20)      | 3 (3)       |
| Type                                         | Type 2                  | None              | Type 1            | Type 1           | Type 1 and 2      | Type 1 and 2 | None        |
| Height (cm), mean (SD)                       | 171 (10)                | 171 (10)          | 173 (10)          | 170 (10)         | 169 (10)          | 172 (10)     | 172 (9)     |
| Weight (kg), mean (SD)                       | 79 (16)                 | 90 (21)           | 73 (12)           | 74 (13)          | 91 (24)           | 85 (21)      | 78 (15)     |
| BMI (kg/m <sup>2</sup> ), mean (SD)          | 27 (4)                  | 31 (7)            | 25 (3)            | 26 (6)           | 32 (8)            | 28 (6)       | 26 (4)      |
| <20, N (%)                                   | 4 (40)                  | 38 (2)            | 37 (4)            | 42 (15)          | 21(3)             | 4 (5)        | 6 (6)       |
| 20-25, N (%)                                 | 327 (31)                | 269 (16)          | 557 (57)          | 94 (33)          | 98 (15)           | 23 (26)      | 34 (35)     |
| 25-30, N (%)                                 | 431 (41)                | 555 (34)          | 343 (35)          | 98 (35)          | 185 (28)          | 32 (36)      | 36 (38)     |
| >30, N (%)                                   | 248 (24)                | 785 (48)          | 48 (5)            | 50 (18)          | 349 (53)          | 29 (33)      | 20 (21)     |
| GFR (mL/min/1.73 m <sup>2</sup> ), mean (SD) | 33 (14)                 | 57 (23)           | 124 (20)          | 72 (33)          | 50 (21)           | 53 (31)      | 102 (18)    |
| Serum creatinine (mg/dL), mean (SD)          | 2.3 (1.1)               | 1.7 (0.8)         | 0.8 (0.1)         | 1.4 (0.6)        | 1.7 (0.6)         | 1.7 (1.1)    | 0.8 (0.2)   |
| Standardized Cystatin C (mg/dL), mean (SD)   | 2.1 (0.7)               | 1.5 (0.6)         | 0.7 (0.1)         | 1.3 (0.6)        | 1.6 (0.5)         | 1.7 (0.9)    | 0.8 (0.1)   |



**Table S1a. Category 1: Studies and Participant Characteristics (continued)**

| Name                                          | MAYO<br>CKD <sup>10</sup> | MAYO<br>Donor <sup>10</sup> | GRONINGEN<br>CKD <sup>11</sup> | GRONINGEN<br>Donor <sup>12</sup> | RASS <sup>13</sup>      | CRISP <sup>14</sup> |
|-----------------------------------------------|---------------------------|-----------------------------|--------------------------------|----------------------------------|-------------------------|---------------------|
| <b>Study Characteristics</b>                  |                           |                             |                                |                                  |                         |                     |
| Type                                          | CP                        | CP                          | CP                             | CP                               | RS                      | Cohort              |
| Center                                        | SC                        | SC                          | SC                             | SC                               | MC                      | MC                  |
| N                                             | 203                       | 50                          | 29                             | 34                               | 39                      | 197                 |
| Filtration Marker                             | Iothalamate               | Iothalamate                 | Iothalamate                    | Iothalamate                      | Iothalamate,<br>Iohexol | Iothalamate         |
| Dates                                         | 1999-2000                 | 1996-2002                   | 2005 - 2007                    | 2005-2007                        | 1998-2006               | 2000-2001           |
| <b>Clinical Characteristics</b>               |                           |                             |                                |                                  |                         |                     |
| Age (years), mean (SD)                        | 55 (16)                   | 41 (11)                     | 41(14)                         | 52 (13)                          | 24 (5)                  | 34 (8)              |
| Age categories, N (%)                         |                           |                             |                                |                                  |                         |                     |
| <40                                           | 39 (19)                   | 19 (38)                     | 17 (59)                        | 6 (18)                           | 39 (100)                | 145 (74)            |
| 40-65                                         | 103 (51)                  | 30 (60)                     | 12 (41)                        | 22 (65)                          | 0 (0)                   | 52 (26)             |
| >65                                           | 61(30)                    | 1 (2)                       | 0 (0)                          | 6 (18)                           | 0 (0)                   | 0 (0)               |
| Sex (Female), N (%)                           | 91 (45)                   | 34 (68)                     | 27 (59)                        | 13 (38)                          | 15 (38)                 | 117 (59)            |
| Blacks, N (%)                                 | 1 (0)                     | 0 (0)                       | 1 (3)                          | 0 (0)                            | 1 (3)                   | 21 (11)             |
| Diabetes, N (%)                               | 37 (18)                   | 0 (0)                       | 5 (17)                         | 0 (0)                            | 39 (100)                | 0 (0)               |
| Type                                          | Type 1 and 2              | None                        | Type 1 and 2                   | None                             | Type 1                  | None                |
| Height (cm), mean (SD)                        | 171 (10)                  | 168 (9)                     | 170 (11)                       | 177 (10)                         | 171 (10)                | 173 (11)            |
| Weight (kg), mean (SD)                        | 87 (23)                   | 80 (17)                     | 71(14)                         | 83 (17)                          | 75 (15)                 | 78 (18)             |
| BMI (kg/m <sup>2</sup> ), mean (SD)           | 30 (7)                    | 28 (6)                      | 24 (3)                         | 26 (4)                           | 26 (4)                  | 26 (5)              |
| <20, N (%)                                    | 7 (3)                     | 1 (2)                       | 2 (7)                          | 1 (3)                            | 0 (0)                   | 15 (8)              |
| 20-25, N (%)                                  | 44 (22)                   | 14 (28)                     | 16 (56)                        | 12 (35)                          | 19 (49)                 | 78 (40)             |
| 25-30, N (%)                                  | 73 (36)                   | 20 (40)                     | 10 (34)                        | 13 (38)                          | 16 (41)                 | 69 (35)             |
| >30, N (%)                                    | 79 (39)                   | 15 (30)                     | 1 (3)                          | 8 (24)                           | 4 (10)                  | 35 (18)             |
| GFR (mL/min/1.73 m <sup>2</sup> ), mean (SD)  | 51 (29)                   | 101 (16)                    | 82 (33)                        | 103 (19)                         | 143 (19)                | 95 (23)             |
| Serum creatinine (mg/dL), mean (SD)           | 1.6 (0.2)                 | 0.7 (0.2)                   | 1.1 (0.8)                      | 0.9 (0.1)                        | 0.8 (0.1)               | 0.9 (0.2)           |
| Standardized Cystatin C (mg/dL),<br>mean (SD) | 1.8 (0.8)                 | 0.9 (0.1)                   | 1.4 (0.7)                      | 1.0 (0.1)                        | 0.8 (0.1)               | 0.9 (0.2)           |

Abbreviations: MDRD Study, Modification of Diet in Renal Disease Study; AASK, African American Study of Kidney Diseases and Hypertension; DCCT, Diabetes Control and Complications Trial; CSG, Collaborative Study Group: Captopril in Diabetic Nephropathy Study; CRIC, Chronic Renal Insufficiency Cohort Study; CCF, Cleveland Clinic Foundation; MC, multicenter; SC, Single Center; RS, research study; CP, clinical population; SC, single center; MC, multi-center; GFR, glomerular filtration rate; BMI, body mass index; SD, standard deviation  
To convert GFR from mL/min/1.73 m<sup>2</sup> to mL/s/m<sup>2</sup>, multiply by 0.0167. To convert serum creatinine from mg/dL to μmol/L, multiply by 88.4.

**Table S1b: Category 2: Studies and Participant Characteristics**

| Name                                         | NephroTest <sup>15</sup> | Steno <sup>16-18</sup> | RASS <sup>13</sup> | Lund CKD <sup>19</sup> | Lund Donor <sup>19</sup> |
|----------------------------------------------|--------------------------|------------------------|--------------------|------------------------|--------------------------|
| <b>Study Characteristics</b>                 |                          |                        |                    |                        |                          |
| Type                                         | CP                       | RCT                    | RCT                | CP                     | CP                       |
| Center                                       | SC                       | SC                     | MC                 | SC                     | SC                       |
| N                                            | 313                      | 245                    | 211                | 343                    | 7                        |
| Filtration Marker                            | EDTA                     | EDTA                   | Iohexol            | Iohexol                | Iohexol                  |
| Dates                                        | 1993-2007                | 1989-2003              | 1998-2006          | 2003                   | 2003                     |
| <b>Clinical Characteristics</b>              |                          |                        |                    |                        |                          |
| Age (years), mean (SD)                       | 59 (15)                  | 43 (9)                 | 33 (9)             | 58 (16)                | 59 (10)                  |
| Age categories, N (%)                        |                          |                        |                    |                        |                          |
| <40                                          | 38 (12)                  | 110 (45)               | 161 (76)           | 46 (13)                | 2 (29)                   |
| 40-65                                        | 159 (51)                 | 134 (55)               | 50 (24)            | 182 (53)               | 5 (71)                   |
| >65                                          | 116 (37)                 | 1 (0)                  | 0 (0)              | 115 (34)               | 0 (0)                    |
| Sex (Female), N (%)                          | 90 (29)                  | 85 (35)                | 109 (52)           | 167 (49)               | 5 (71)                   |
| Blacks, N (%)                                | 25 (8)                   | 0 (0)                  | 5 (2)              | 0 (0)                  | 0 (0)                    |
| Diabetes, N (%)                              | 72 (23)                  | 245 (100)              | 211 (100)          | 66 (19)                | 0 (0)                    |
| Type                                         | Type 1 and 2             | Type 1                 | Type 1             | Type 1 and 2           | None                     |
| Height (cm), mean (SD)                       | 168 (9)                  | 173 (9)                | 171 (9)            | 170 (10)               | 174 (9)                  |
| Weight (kg), mean (SD)                       | 74 (16)                  | 72 (12)                | 76 (14)            | 74 (17)                | 79 (10)                  |
| BMI (kg/m <sup>2</sup> ), mean (SD)          | 26 (4)                   | 24 (3)                 | 26 (4)             | 26 (5)                 | 26 (2)                   |
| <20, N (%)                                   | 22 (7)                   | 20 (8)                 | 0 (0)              | 39 (11)                | 0 (0)                    |
| 20-25, N (%)                                 | 117 (37)                 | 147 (60)               | 98 (46)            | 139 (41)               | 2 (29)                   |
| 25-30, N (%)                                 | 119 (38)                 | 66 (27)                | 84 (40)            | 112 (33)               | 5 (71)                   |
| >30, N (%)                                   | 55 (18)                  | 12 (5)                 | 29 (14)            | 53 (15)                | 0 (0)                    |
| GFR (mL/min/1.73 m <sup>2</sup> ), mean (SD) | 35 (18)                  | 72 (31)                | 128 (19)           | 64 (33)                | 88 (18)                  |
| Serum creatinine (mg/dL), mean (SD)          | 2.4 (1.2)                | 1.5 (0.8)              | 0.8 (0.1)          | 1.5 (1.1)              | 1.0 (0.2)                |
| Standardized Cystatin C (mg/dL), mean (SD)   | 2.0 (0.7)                | 1.3 (0.6)              | 0.8 (0.1)          | 1.6 (0.8)              | 1.0 (0.2)                |

RASS, Renin Angiotensin System Study; MC, multicenter; SC, Single Center; CP, clinical population; SC, single center; MC, multi-center; GFR, glomerular filtration rate; BMI, body mass index; SD, standard deviation; EDTA, ethylenediaminetetraacetic acid. To convert GFR from mL/min/1.73 m<sup>2</sup> to mL/s/m<sup>2</sup>, multiply by 0.0167. To convert serum creatinine from mg/dL to μmol/L, multiply by 88.4.

**Table S2: Serum Cystatin C Measurements or Calibration by Study**

| Study                                          | Date                                      | Sample Size | Instrument                        | Calibration Equation to IFCC Serum Cystatin C                           |
|------------------------------------------------|-------------------------------------------|-------------|-----------------------------------|-------------------------------------------------------------------------|
| <b>Direct Measurements at Cleveland Clinic</b> |                                           |             |                                   |                                                                         |
| MDRD Study <sup>3</sup>                        | Jul 2004                                  | 1,047       | CCRL BN-II                        | IFCC Scys = 1.12 x (0.083 + 0.789 x MDRD Scys)                          |
| AASK <sup>6</sup>                              | May 2005                                  | 1,645       | CCRL BN-II                        | IFCC Scys = 1.12 x (0.083 + 0.789 x AASK Scys)                          |
| CSG <sup>7</sup>                               | Apr 2005                                  | 386         | CCRL BN-II                        | IFCC Scys = 1.12 x (0.083 + 0.789 x CSG Scys)                           |
| NephroTest <sup>15</sup>                       | Sep 2005                                  | 438         | CCRL BN-II                        | IFCC Scys = 1.12 x (0.083 + 0.789 x Paris Scys)                         |
| Steno <sup>16-18</sup>                         | Dec 2005                                  | 260         | CCRL BN-II                        | IFCC Scys = 1.12 x (0.083 + 0.789 x Steno Scys)                         |
| RASS <sup>13</sup>                             | Feb 2007                                  | 524         | CCRL BN-II                        | IFCC Scys = 1.12 x (0.105 + 0.848 x RASS Scys)                          |
| NHS                                            | Feb 2007                                  | 58          | CCRL BN-II                        | IFCC Scys = 1.12 x (0.105 + 0.848 x NHS Scys)                           |
| GRONIGEN <sup>11</sup>                         | Mar 2007                                  | 200         | CCRL BN-II                        | IFCC Scys = 1.12 x (0.105 + 0.848 x Groningen Scys)                     |
| CCF Prospective                                | Apr 2007                                  | 200         | CCRL BN-II                        | IFCC Scys = 1.12 x (0.105 + 0.848 x CCF Scys)                           |
| CRISP <sup>14</sup>                            | May 2007                                  | 218         | CCRL BN-II                        | IFCC Scys = 1.12 x (0.105 + 0.848 x CRISP Scys)                         |
| Lund <sup>19</sup>                             | CCRL: Oct 2005<br>Lund: Feb-Oct 2003      | 200         | CCRL: BNII<br>Lund: Hitachi Mod P | IFCC Scys = 1.12 x (0.083 + 0.789 x (-0.574 + 1.611 x Grubb/Lund Scys)) |
| DCCT <sup>6</sup>                              | CCRL: Feb-Mar 2006<br>DCCT: Feb-Apr 2005  | 197         | CCRL: BNII<br>DCCT: ProSpec       | IFCC Scys = 1.12 x (0.083 + 0.789 x (0.018 + 0.882 x DCCT Scys))        |
| CRIC <sup>8</sup>                              | CCRL: 2003<br>Penn: Feb 2008              | 39*         | CCRL: BN-II<br>Penn: BN-II        | IFCC Scys = 1.12 x (0.083 + 0.789 x (0.039 + 1.061 x CRIC Cys))         |
| MAYO <sup>10</sup>                             | CCRL: Dec 2006<br>Mayo: Oct 1999-Mar 2000 | 292         | CCRL: BN-II<br>Mayo: BN-II        | IFCC Scys = 1.12 x (0.105 + 0.848 x (0.076 + 1.023 x Mayo Scys))        |

\* Calibration panel measured in triplicate at both CCF and Penn

CCRL, Cleveland Clinic Research Laboratory; BN-II, Dade Behring Nephelometer; Scys, serum cystatin C

**Table S3: Previously Developed Equations in CKD Populations Re-expressed for Use with Standardized Serum Creatinine or Serum Cystatin C**

|                                             |                                                                                                                                                            |
|---------------------------------------------|------------------------------------------------------------------------------------------------------------------------------------------------------------|
| <b>MDRD Study equation</b> <sup>3</sup>     | $175 \times \text{standardized Scr}^{-1.154} \times \text{age}^{-2.03} \times 0.75$ [if female] x<br>1.210 [if black]                                      |
| <b>Cystatin C</b> <sup>1,2</sup>            | $127.7 * (-0.105 + 1.13 \times \text{standardized Scys})^{-1.17} \times \text{age}^{-0.13}$<br>x 0.91 [if female] x 1.06 [if black]                        |
| <b>Creatinine-Cystatin C</b> <sup>1,2</sup> | $177.6 * \text{Scr}^{-0.65} \times (-0.105 + 1.13 \times \text{standardized Scys})^{-0.57}$<br>x $\text{age}^{-0.20}$ x 0.82 [if female] x 1.11 [if black] |

Scr, serum creatinine; Scys, serum cystatin C. Units for serum creatinine are mg/dl ; for cystatin C are mg/L; and for age is years.

**Table S4: Forms of Variables and Coefficients in the CKD-EPI Equations Developed in Diverse Population**

| Variable   | Creatinine                                                                                          |                                                                                                                                                                                 | Cystatin C                                             |                                                                                                                      | Creatinine and Cystatin C                                                                           |                                                                                                                                                                                 |
|------------|-----------------------------------------------------------------------------------------------------|---------------------------------------------------------------------------------------------------------------------------------------------------------------------------------|--------------------------------------------------------|----------------------------------------------------------------------------------------------------------------------|-----------------------------------------------------------------------------------------------------|---------------------------------------------------------------------------------------------------------------------------------------------------------------------------------|
|            | Form for Estimating GFR on Log Scale                                                                | Coefficient (95% CI) for Estimating GFR on Natural Scale                                                                                                                        | Form for Estimating GFR on Log Scale                   | Coefficient (95% CI) for Estimating GFR on Natural Scale                                                             | Form for Estimating GFR on Log Scale                                                                | Coefficient (95% CI) for Estimating GFR on Natural Scale                                                                                                                        |
| Creatinine | 2-slope spline on the log scale with sex specific knots (0.7 mg/dl for women and 0.9 mg/dl for men) | Above the knot<br>All: Scr <sup>-1.209</sup> (-1.198, -1.220)<br>Below the knot<br>Women: Scr <sup>-0.329</sup> (-0.230, -0.428)<br>Men: Scr <sup>-0.411</sup> (-0.314, -0.508) |                                                        |                                                                                                                      | 2-slope spline on the log scale with sex specific knots (0.7 mg/dl for women and 0.9 mg/dl for men) | Above the knot<br>All: Scr <sup>-0.601</sup> (-0.630, -0.571)<br>Below the knot<br>Women: Scr <sup>-0.248</sup> (-0.364, -0.132)<br>Men: Scr <sup>-0.207</sup> (-0.308, -0.107) |
| Cystatin C |                                                                                                     |                                                                                                                                                                                 | 2-slope spline on the log scale with knots at 0.8 mg/L | Above the knot<br>Scys <sup>-1.328</sup> (-1.344, -1.312)<br>Below the knot: Scys <sup>-0.499</sup> (-0.610, -0.388) | 2-slope spline on the log scale with knots at 0.8 mg/L                                              | Above the knot<br>Scys <sup>-0.711</sup> (-0.744, -0.678)<br>Below the knot:<br>Scys <sup>-0.375</sup> (-0.477, -0.274)                                                         |
| Race       | Black vs. White or other                                                                            | 1.159 (1.144, 1.170) if Black<br>1.0 if White or other                                                                                                                          |                                                        |                                                                                                                      | Black vs. White or other                                                                            | 1.08 (1.067, 1.093) if Black<br>1.0 if White or other                                                                                                                           |
| Sex        | Female vs. Male                                                                                     | 1.018 (1.007, 1.029) if Female<br>1.0 if Male                                                                                                                                   | Female vs. Male                                        | 0.932 (0.921, 0.944) if Female<br>1.0 if Male                                                                        | Female vs. Male                                                                                     | 0.969 (0.958, 0.980) if Female<br>1.0 if Male                                                                                                                                   |
| Age        | Linear on the natural scale                                                                         | 0.993 (0.9925, 0.9933) <sup>Age</sup>                                                                                                                                           | Linear on the natural scale                            | 0.996 (0.9957, 0.9966) <sup>Age</sup>                                                                                | Linear on the natural scale                                                                         | 0.995 (0.9948, 0.9957) <sup>Age</sup>                                                                                                                                           |

Formulation of the equations are shown in Table 2

Variables included in the CKD-EPI cystatin C equation are spline log cystatin C, sex and age. Serum cystatin C is modeled as a two-slope linear spline with a knot at 60 nmol/L (0.8 mg/L) and allows for a steeper slope of logarithm of GFR vs. logarithm of cystatin C above the knot [-1.328 (-1.344, -1.312)] and a less steep slope below the knot [0.499 (-0.610, -0.388)]. Females and older adults have lower GFR than males and younger adults (7% lower for men vs. women and 2% lower GFR per 5 years of age for the same level of cystatin C).

Variables included in the CKD-EPI creatinine and cystatin C equation are spline log serum creatinine, spline log serum cystatin C, sex, race and age. Log creatinine is modeled as it is in the CKD-EPI creatinine equation; a two-slope linear spline term with sex-specific knots at 62 μmol/L (0.7 mg/dL) in women and 80 μmol/L (0.9 mg/dL) in men. Log cystatin C is modeled as in the cystatin C equation. Above the knots for log creatinine

and log cystatin C, the slopes are similar to each other [-0.601 (-0.630, -0.571)] and [-0.711(-0.744, -0.678), respectively] and are approximately half the size of the corresponding coefficients in the equations with each marker alone. The relationship between sex and estimated GFR varies according to the level of serum creatinine. The predicted female-to-male ratio in GFR varies from 0.87 to 0.93 when the serum creatinine is between 44 to 71  $\mu\text{mol/L}$  (0.5 and 0.8 mg/dL), and is 0.83 when serum creatinine is  $\geq 80 \mu\text{mol/L}$  ( $\geq 0.9 \text{ mg/dL}$ ). For every additional 5 years of age, there is a 2% lower GFR. The coefficient for Blacks predicts an 8% higher GFR for the same level of creatinine or cystatin C compared to 16% in the CKD-EPI creatinine equation. The addition of diabetes or weight did not improve performance.

To convert serum creatinine from mg/dL to  $\mu\text{mol/L}$ , multiply by 88.4. Coefficients for cystatin C and creatinine-cystatin C equations derived from pooled development and internal validation datasets.

**Table S5: Newly Developed Equations that May Be of Interest in Research**

|                                                  |                                                                                                                                                                                                            |
|--------------------------------------------------|------------------------------------------------------------------------------------------------------------------------------------------------------------------------------------------------------------|
| <b>Spline Log Cystatin C</b>                     | $109 \times \min(\text{standardized Scys} / 0.8, 1)^{-0.683} \times \max(\text{standardized Scys} / 0.8, 1)^{-1.367}$                                                                                      |
| <b>Spline Log Cystatin C, Age, Sex, Race</b>     | $132 \times \min(\text{standardized Scys} / 0.8, 1)^{-0.491} \times \max(\text{standardized Scys} / 0.8, 1)^{-1.329} \times 0.996^{\text{Age}} \times 0.932$ [if female] $\times 0.992$ [if black]         |
| <b>Spline Log Cystatin C, Age, Sex, Diabetes</b> | $126 \times \min(\text{standardized Scys} / 0.8, 1)^{-0.362} \times \max(\text{standardized Scys} / 0.8, 1)^{-1.318} \times 0.997^{\text{Age}} \times 0.934$ [if female] $\times 1.068$ [if diabetes]      |
| <b>Spline Log Cystatin C, Age, Sex, Weight</b>   | $132 \times \min(\text{standardized Scys} / 0.8, 1)^{-0.567} \times \max(\text{standardized Scys} / 0.8, 1)^{-1.329} \times 0.996^{\text{Age}} \times 0.949$ [if female] $\times 1.002^{\text{Weight}-80}$ |

For all of the above equations, min indicates minimum of standardized Scys /0.8 or 1, and max indicates maximum of standardized Scys/08 or 1 .

Units of cystatin C are mg/L, units for age is years and units for weight is kilograms.

**Table S6: Comparison of Performance of Equations in the Development Dataset by Level of GFR and Race**

| Variables included in each equation               | Group         | Difference<br>(Measured GFR-<br>Estimated GFR)<br><i>ml/min/1.73 m<sup>2</sup></i> |      | % of Estimates<br>greater than<br>20% or 30% of<br>Measured GFR |                   | RMSE  |
|---------------------------------------------------|---------------|------------------------------------------------------------------------------------|------|-----------------------------------------------------------------|-------------------|-------|
|                                                   |               | Median                                                                             | IQR  | 1-P <sub>20</sub>                                               | 1-P <sub>30</sub> |       |
|                                                   |               |                                                                                    |      |                                                                 |                   |       |
| <b>Spline Log Creatinine,<br/>Age, Sex, Race*</b> | Overall       | 0.4                                                                                | 14.9 | 31.8                                                            | 15.1              | 0.228 |
|                                                   | Estimated GFR |                                                                                    |      |                                                                 |                   |       |
|                                                   | >90           | 2.6                                                                                | 26.4 | 23.9                                                            | 9.5               | 0.196 |
|                                                   | 60-90         | -0.7                                                                               | 20.8 | 34.4                                                            | 15.6              | 0.230 |
|                                                   | <60           | 0.1                                                                                | 9.5  | 35.3                                                            | 18.0              | 0.243 |
|                                                   | Race          |                                                                                    |      |                                                                 |                   |       |
|                                                   | Black         | 0.0                                                                                | 14.3 | 34.8                                                            | 16.3              | 0.237 |
| Non-Black                                         | 0.6           | 15.6                                                                               | 29.9 | 14.3                                                            | 0.221             |       |
| <b>Log Cystatin C</b>                             | Overall       | 0.2                                                                                | 15.1 | 33.8                                                            | 17.2              | 0.235 |
|                                                   | Estimated GFR |                                                                                    |      |                                                                 |                   |       |
|                                                   | >90           | 0.0                                                                                | 26.5 | 27.3                                                            | 11.8              | 0.216 |
|                                                   | 60-90         | 1.3                                                                                | 21.9 | 34.5                                                            | 18.0              | 0.235 |
|                                                   | <60           | 0.1                                                                                | 9.9  | 37.0                                                            | 19.8              | 0.244 |
|                                                   | Race          |                                                                                    |      |                                                                 |                   |       |
|                                                   | Black         | -0.3                                                                               | 14.1 | 34.4                                                            | 18.5              | 0.242 |
| Non-Black                                         | 0.7           | 16.2                                                                               | 33.4 | 16.4                                                            | 0.230             |       |
| <b>Spline Log Cystatin C</b>                      | Overall       | 0.4                                                                                | 15.0 | 33.2                                                            | 16.6              | 0.232 |
|                                                   | Estimated GFR |                                                                                    |      |                                                                 |                   |       |
|                                                   | >90           | 2.7                                                                                | 24.5 | 24.8                                                            | 10.5              | 0.207 |
|                                                   | 60-90         | -1.3                                                                               | 21.1 | 36.2                                                            | 18.2              | 0.234 |
|                                                   | <60           | 0.2                                                                                | 9.8  | 36.8                                                            | 19.3              | 0.245 |
|                                                   | Race          |                                                                                    |      |                                                                 |                   |       |
|                                                   | Black         | -0.6                                                                               | 14.3 | 35.6                                                            | 19.6              | 0.245 |
| Non-Black                                         | 1.2           | 16.0                                                                               | 31.7 | 14.6                                                            | 0.223             |       |
| <b>Spline Log Cystatin C,<br/>Age, Sex</b>        | Overall       | 0.3                                                                                | 14.3 | 31.3                                                            | 15.1              | 0.224 |
|                                                   | Estimated GFR |                                                                                    |      |                                                                 |                   |       |
|                                                   | >90           | 1.2                                                                                | 24.1 | 21.9                                                            | 8.6               | 0.189 |
|                                                   | 60-90         | -0.5                                                                               | 18.9 | 31.9                                                            | 15.4              | 0.222 |
|                                                   | <60           | 0.4                                                                                | 10.1 | 36.4                                                            | 18.7              | 0.242 |
|                                                   | Race          |                                                                                    |      |                                                                 |                   |       |
|                                                   | Black         | 0.1                                                                                | 13.1 | 32.8                                                            | 17.3              | 0.235 |
| Non-Black                                         | 0.5           | 15.3                                                                               | 30.2 | 13.6                                                            | 0.216             |       |
| <b>Spline Log Cystatin C,<br/>Age, Sex, Race</b>  | Overall       | 0.3                                                                                | 14.2 | 31.1                                                            | 15.1              | 0.224 |
|                                                   | Estimated GFR |                                                                                    |      |                                                                 |                   |       |
|                                                   | >90           | 1.3                                                                                | 23.8 | 21.8                                                            | 8.6               | 0.189 |
|                                                   | 60-90         | -0.6                                                                               | 19.1 | 31.3                                                            | 15.2              | 0.221 |
|                                                   | <60           | 0.4                                                                                | 10.1 | 36.4                                                            | 18.9              | 0.243 |



|                                                                       |               |      |      |      |      |       |
|-----------------------------------------------------------------------|---------------|------|------|------|------|-------|
|                                                                       | Race          |      |      |      |      |       |
|                                                                       | Black         | 0.2  | 13.1 | 32.7 | 17.2 | 0.235 |
|                                                                       | Non-Black     | 0.4  | 15.3 | 30.1 | 13.8 | 0.216 |
|                                                                       | Overall       | 0.1  | 12.1 | 24.1 | 9.8  | 0.195 |
|                                                                       | Estimated GFR |      |      |      |      |       |
| <b>Spline Log Creatinine,<br/>Log Cystatin C, Age,<br/>Sex , Race</b> | >90           | 0.4  | 22.8 | 17.9 | 6.3  | 0.176 |
|                                                                       | 60-90         | -0.5 | 15.5 | 25.0 | 10.2 | 0.194 |
|                                                                       | <60           | 0.1  | 8.0  | 27.2 | 11.6 | 0.206 |
|                                                                       | Race          |      |      |      |      |       |
|                                                                       | Black         | 0.3  | 11.7 | 26.2 | 11.2 | 0.204 |
|                                                                       | Non-Black     | 0.0  | 12.7 | 22.7 | 8.9  | 0.188 |

GFR, glomerular filtrate rate; IQR, interquartile range; RMSE, root mean square error

\*Similar to CKD-EPI creatinine equation but re-expressed in the development dataset.

Median difference refers to measured GFR – estimated GFR. Interquartile range of the difference refers to the 25-75<sup>th</sup> percentile. Units of GFR in ml/min/1.73 m<sup>2</sup>. To convert GFR from mL/min/1.73 m<sup>2</sup> to mL/s/1.73 m<sup>2</sup>, multiply by 0.0167.

**Table S7: Performance within the Development Dataset with Data Available on Proteinuria, overall and by proteinuria subgroup**

| Equation                                 | Group                           | N    | Difference<br>(Measured GFR-<br>Estimated GFR)<br><i>ml/min/1.73 m<sup>2</sup></i> |      | % of Estimates<br>greater than 20%<br>or 30% of<br>Measured GFR |                 | RMSE  |
|------------------------------------------|---------------------------------|------|------------------------------------------------------------------------------------|------|-----------------------------------------------------------------|-----------------|-------|
|                                          |                                 |      | Median                                                                             | IQR  | P <sub>20</sub>                                                 | P <sub>30</sub> |       |
| <b>Creatinine (CKD-EPI,<sup>3</sup>)</b> | Overall                         | 4852 | 0.7                                                                                | 14.6 | 68.9                                                            | 85.9            | 0.223 |
|                                          | Proteinuria < 70<br>mg/24 hours | 2279 | 2.8                                                                                | 19.7 | 73.1                                                            | 89.6            | 0.206 |
|                                          | Proteinuria > 70<br>mg/24 hours | 2287 | -0.6                                                                               | 10.9 | 65.0                                                            | 82.5            | 0.236 |
| <b>Cystatin C</b>                        | Overall                         | 4852 | 0.1                                                                                | 13.9 | 69.6                                                            | 85.3            | 0.222 |
|                                          | Proteinuria < 70<br>mg/24 hours | 2279 | 1.1                                                                                | 18.3 | 74.4                                                            | 88.3            | 0.206 |
|                                          | Proteinuria > 70<br>mg/24 hours | 2287 | -0.5                                                                               | 10.7 | 64.9                                                            | 82.3            | 0.238 |
| <b>Creatinine-cystatin C</b>             | Overall                         | 4852 | 0.2                                                                                | 11.9 | 76.4                                                            | 90.7            | 0.193 |
|                                          | Proteinuria < 70<br>mg/24 hours | 2279 | 0.8                                                                                | 16.4 | 79.8                                                            | 92.2            | 0.182 |
|                                          | Proteinuria > 70<br>mg/24 hours | 2287 | -0.1                                                                               | 8.9  | 73.4                                                            | 89.2            | 0.204 |

GFR, glomerular filtrate rate; IQR, interquartile range; RMSE, root mean square error  
Median difference refers to measured GFR – estimated GFR. Interquartile range of the difference refers to the 25-75<sup>th</sup> percentile. To convert GFR from mL/min/1.73 m<sup>2</sup> to mL/s/1.73 m<sup>2</sup>, multiply by 0.0167.

**Table S8: Performance of Cystatin C Estimating Equation with and without Diabetes in Development and External Validation Datasets**

| Variables included in each equation              | Group         | N    | Difference<br>(Measured GFR-<br>Estimated GFR)<br><i>ml/min/1.73 m<sup>2</sup></i> |      | % of Estimates<br>greater than 20% or<br>30% of Measured<br>GFR |                   | RMSE  |
|--------------------------------------------------|---------------|------|------------------------------------------------------------------------------------|------|-----------------------------------------------------------------|-------------------|-------|
|                                                  |               |      | Median                                                                             | IQR  | 1-P <sub>20</sub>                                               | 1-P <sub>30</sub> |       |
|                                                  |               |      | <b>Development</b>                                                                 |      |                                                                 |                   |       |
| <b>Spline Log Cystatin C, Age, Sex</b>           | Overall       | 5352 | 0.3                                                                                | 14.3 | 31.3                                                            | 15.1              | 0.224 |
|                                                  | Estimated GFR |      |                                                                                    |      |                                                                 |                   |       |
|                                                  | >90           | 1556 | 1.2                                                                                | 24.1 | 21.9                                                            | 8.6               | 0.189 |
|                                                  | 60-90         | 1081 | -0.5                                                                               | 18.9 | 31.9                                                            | 15.4              | 0.222 |
|                                                  | <60           | 2715 | 0.4                                                                                | 10.1 | 36.4                                                            | 18.7              | 0.242 |
|                                                  | Diabetes      |      |                                                                                    |      |                                                                 |                   |       |
|                                                  | No            | 3626 | -0.6                                                                               | 12.4 | 34.3                                                            | 17.5              | 0.230 |
|                                                  | Yes           | 1726 | 2.9                                                                                | 18.7 | 25.0                                                            | 9.9               | 0.210 |
| <b>Spline Log Cystatin C, Age, Sex, Diabetes</b> | Overall       | 5352 | 0.2                                                                                | 14.3 | 30.4                                                            | 14.6              | 0.222 |
|                                                  | Estimated GFR |      |                                                                                    |      |                                                                 |                   |       |
|                                                  | >90           | 1529 | 0.1                                                                                | 23.9 | 20.7                                                            | 7.8               | 0.185 |
|                                                  | 60-90         | 1100 | 0.1                                                                                | 19.3 | 30.8                                                            | 15.2              | 0.220 |
|                                                  | <60           | 2723 | 0.3                                                                                | 9.9  | 35.7                                                            | 18.1              | 0.242 |
|                                                  | Diabetes      |      |                                                                                    |      |                                                                 |                   |       |
|                                                  | No            | 3626 | 0.1                                                                                | 12.4 | 33.3                                                            | 16.7              | 0.229 |
|                                                  | Yes           | 1726 | 0.4                                                                                | 18.5 | 24.3                                                            | 10.1              | 0.208 |
| <b>External Validation</b>                       |               |      |                                                                                    |      |                                                                 |                   |       |
| <b>Spline Log Cystatin C, Age, Sex</b>           | Overall       | 1119 | 3.4                                                                                | 16.4 | 33.0                                                            | 14.1              | 0.234 |
|                                                  | Estimated GFR |      |                                                                                    |      |                                                                 |                   |       |
|                                                  | >90           | 320  | 8.5                                                                                | 22.6 | 19.4                                                            | 2.2               | 0.164 |
|                                                  | 60-90         | 229  | 6.0                                                                                | 19.6 | 29.3                                                            | 12.7              | 0.208 |
|                                                  | <60           | 570  | 0.4                                                                                | 11.0 | 42.1                                                            | 21.4              | 0.274 |
|                                                  | Diabetes      |      |                                                                                    |      |                                                                 |                   |       |
|                                                  | No            | 525  | -0.1                                                                               | 15.1 | 42.3                                                            | 21.0              | 0.263 |
|                                                  | Yes           | 594  | 5.9                                                                                | 16.4 | 24.7                                                            | 8.1               | 0.205 |
| <b>Spline Log Cystatin C, Age, Sex, Diabetes</b> | Overall       | 1119 | 1.9                                                                                | 15.7 | 31.6                                                            | 14.7              | 0.231 |
|                                                  | Estimated GFR |      |                                                                                    |      |                                                                 |                   |       |
|                                                  | >90           | 335  | 7.1                                                                                | 21.9 | 15.2                                                            | 2.4               | 0.152 |
|                                                  | 60-90         | 220  | 4.8                                                                                | 19.7 | 30.0                                                            | 12.7              | 0.206 |
|                                                  | <60           | 564  | -0.3                                                                               | 10.3 | 42.0                                                            | 22.9              | 0.275 |
|                                                  | Diabetes      |      |                                                                                    |      |                                                                 |                   |       |
|                                                  | No            | 525  | 0.8                                                                                | 15.1 | 42.3                                                            | 21.3              | 0.262 |
|                                                  | Yes           | 594  | 3.0                                                                                | 16.0 | 22.2                                                            | 8.9               | 0.199 |

The addition of diabetes in models with cystatin C led to a small improvement in bias or RMSE in subgroups with diabetes or higher levels of GFR, but given the small number of studies, this

small improvement may not be generalizable, and we concluded not to recommend use of this equation in clinical practice.

GFR, glomerular filtrate rate; IQR, interquartile range; RMSE, root mean square error  
Median difference refers to measured GFR – estimated GFR. Interquartile range of the difference refers to the 25-75<sup>th</sup> percentile. To convert GFR from mL/min/1.73 m<sup>2</sup> to mL/s/1.73 m<sup>2</sup>, multiply by 0.0167.

**Table S9: Performance of Cystatin C Estimating Equation with and without Weight in Development and External Validation Datasets**

| Variables included in each equation     | Group   | N    | Difference (Measured GFR- Estimated GFR) $ml/min/1.73 m^2$ |      | % of Estimates greater than 20% or 30% of Measured GFR |                   | RMSE  |
|-----------------------------------------|---------|------|------------------------------------------------------------|------|--------------------------------------------------------|-------------------|-------|
|                                         |         |      | Median                                                     | IQR  | 1-P <sub>20</sub>                                      | 1-P <sub>30</sub> |       |
|                                         |         |      | <b>Development</b>                                         |      |                                                        |                   |       |
|                                         | Overall | 5352 | 0.3                                                        | 14.3 | 31.3                                                   | 15.1              | 0.224 |
|                                         | BMI     |      |                                                            |      |                                                        |                   |       |
| Spline Log Cystatin C, Age, Sex         | <20     | 214  | -1.5                                                       | 14.5 | 36.0                                                   | 23.8              | 0.258 |
|                                         | 20-25   | 1585 | -0.9                                                       | 16.0 | 31.4                                                   | 14.4              | 0.220 |
|                                         | 25-30   | 1881 | 0.1                                                        | 13.8 | 28.9                                                   | 13.9              | 0.213 |
|                                         | >30     | 1671 | 1.5                                                        | 12.7 | 33.3                                                   | 15.9              | 0.235 |
|                                         | Overall | 5352 | 0.2                                                        | 14.2 | 30.7                                                   | 14.7              | 0.222 |
|                                         | BMI     |      |                                                            |      |                                                        |                   |       |
| Spline Log Cystatin C, Age, Sex, Weight | <20     | 214  | 0.3                                                        | 15.2 | 35.5                                                   | 21.0              | 0.254 |
|                                         | 20-25   | 1585 | 0.4                                                        | 16.0 | 30.5                                                   | 13.4              | 0.219 |
|                                         | 25-30   | 1881 | 0.2                                                        | 13.8 | 27.9                                                   | 13.8              | 0.213 |
|                                         | >30     | 1671 | 0.1                                                        | 13.1 | 33.5                                                   | 16.2              | 0.232 |
| <b>External Validation</b>              |         |      |                                                            |      |                                                        |                   |       |
|                                         | Overall | 1119 | 3.4                                                        | 16.4 | 33.0                                                   | 14.1              | 0.234 |
|                                         | BMI     |      |                                                            |      |                                                        |                   |       |
| Spline Log Cystatin C, Age, Sex         | <20     | 81   | -0.5                                                       | 15.6 | 45.7                                                   | 23.5              | 0.262 |
|                                         | 20-25   | 503  | 3.5                                                        | 15.2 | 28.0                                                   | 12.9              | 0.229 |
|                                         | 25-30   | 386  | 2.8                                                        | 16.7 | 34.2                                                   | 13.7              | 0.221 |
|                                         | >30     | 149  | 5.2                                                        | 17.1 | 39.6                                                   | 14.1              | 0.265 |
|                                         | Overall | 1119 | 3.9                                                        | 16.3 | 33.3                                                   | 13.9              | 0.235 |
|                                         | BMI     |      |                                                            |      |                                                        |                   |       |
| Spline Log Cystatin C, Age, Sex, Weight | <20     | 81   | 0.9                                                        | 16.0 | 45.7                                                   | 17.3              | 0.265 |
|                                         | 20-25   | 503  | 5.1                                                        | 15.5 | 29.2                                                   | 13.5              | 0.233 |
|                                         | 25-30   | 386  | 3.0                                                        | 16.7 | 34.2                                                   | 14.0              | 0.222 |
|                                         | >30     | 149  | 4.3                                                        | 17.1 | 38.3                                                   | 13.4              | 0.256 |

GFR, glomerular filtrate rate; IQR, interquartile range; RMSE, root mean square error; BMI, body mass index. Units of BMI are  $kg/m^2$

Median difference refers to measured GFR – estimated GFR. Interquartile range of the difference refers to the 25-75<sup>th</sup> percentile. To convert GFR from  $mL/min/1.73 m^2$  to  $mL/s/1.73 m^2$ , multiply by 0.0167.

**Table S10: Performance of Equations Developed in CKD Populations in the External Validation Dataset**

| Description                                                                                                       | Overall            | Estimated GFR<br>ml/min per 1.73 m <sup>2</sup> |                    |                    |
|-------------------------------------------------------------------------------------------------------------------|--------------------|-------------------------------------------------|--------------------|--------------------|
|                                                                                                                   |                    | <60                                             | 60-89              | ≥90                |
| <b>Bias, Median Difference (95% CI)</b>                                                                           |                    |                                                 |                    |                    |
| Creatinine (MDRD Study <sup>4</sup> )                                                                             | 6.3 (5.4 - 7.8)    | 3.3 (2.4 - 4.2)                                 | 15.1 (11.9 - 19.4) | 17.2 (13.0 - 20.4) |
| Cystatin C <sup>1,2</sup>                                                                                         | 6.0 (4.9 - 7.1)    | 2.0 (0.8 - 3.1)                                 | 12.4 (9.6 - 14.9)  | 16.0 (12.7 - 17.8) |
| Creatinine-cystatin C <sup>1,2</sup>                                                                              | 4.9 (4.2 - 5.9)    | 2.0 (1.3 - 2.9)                                 | 10.7 (7.7 - 13.0)  | 13.5 (9.7 - 16.0)  |
| <b>Precision, IQR of the Difference (95% CI)</b>                                                                  |                    |                                                 |                    |                    |
| Creatinine (MDRD Study <sup>4</sup> )                                                                             | 19.4 (17.4 - 21.1) | 11.4 (10.3 - 12.4)                              | 22.8 (20.5 - 27.9) | 27.7(24.3 - 34.5)  |
| Cystatin C <sup>1,2</sup>                                                                                         | 18.7 (17.5 - 20.0) | 13.1 (11.9 - 14.3)                              | 21.1 (17.6 - 24.0) | 25.1 (21.4 - 26.9) |
| Creatinine-cystatin C <sup>1,2</sup>                                                                              | 15.3 (14.0 - 16.3) | 9.2 (8.3 - 9.9)                                 | 15.0 (13.3 - 17.6) | 23.3 (19.9 - 26.4) |
| <b>Accuracy, Percentage of Estimates Different from Measured GFR by More than 30% (1-P<sub>30</sub>) (95% CI)</b> |                    |                                                 |                    |                    |
| Creatinine (MDRD Study <sup>4</sup> )                                                                             | 17.4 (15.2 - 19.7) | 17.9 (15.0 - 20.9)                              | 22.0 (17.2 - 27.1) | 10.7 (6.8 - 14.8)  |
| Cystatin C <sup>1,2</sup>                                                                                         | 15.8 (13.8 - 18.0) | 21.8 (18.7 - 25.3)                              | 10.6 (6.8 - 14.8)  | 6.4 (3.7 - 9.5)    |
| Creatinine-cystatin C <sup>1,2</sup>                                                                              | 8.1 (6.6 - 9.8)    | 11.1 (8.6 - 13.7)                               | 5.6 (2.9 - 8.7)    | 4.2 (2.1 - 6.7)    |
| <b>Accuracy, Percentage of Estimates Different from Measured GFR by More than 20% (1-P<sub>20</sub>) (95% CI)</b> |                    |                                                 |                    |                    |
| Creatinine (MDRD Study <sup>4</sup> )                                                                             | 43.4 (40.5 - 46.5) | 41.9 (37.9 - 45.9)                              | 50.2 (44.0 - 56.3) | 39.5 (33.3 - 46.3) |
| Cystatin C <sup>1,2</sup>                                                                                         | 38.6 (35.8 - 41.6) | 42.8 (38.9 - 46.8)                              | 37.9 (31.8 - 43.8) | 29.4 (23.7 - 35.0) |
| Creatinine-cystatin C <sup>1,2</sup>                                                                              | 27.3 (24.8 - 30.0) | 30.5 (26.9 - 34.2)                              | 26.6 (21.3 - 32.6) | 21.5 (16.6 - 26.5) |

See Table S3 for equations developed in the CKD populations

**Table S11: Performance by Study in the Validation Dataset**

| Equation                            | Study                    | N   | P <sub>30</sub> | RMSE  | Within Study %<br>Change vs. eGFR <sub>Cr,Cys</sub> |        |
|-------------------------------------|--------------------------|-----|-----------------|-------|-----------------------------------------------------|--------|
|                                     |                          |     |                 |       | P <sub>30</sub>                                     | RMSE   |
| Creatinine (CKD-EPI, <sup>3</sup> ) | NephroTest <sup>15</sup> | 313 | 84.3            | 0.235 | -4.0%                                               | -17.4% |
|                                     | Steno <sup>16-18</sup>   | 245 | 86.1            | 0.231 | -7.9%                                               | -23.3% |
|                                     | RASS <sup>13</sup>       | 211 | 95.7            | 0.188 | -3.3%                                               | -15.8% |
|                                     | Grubb <sup>19</sup>      | 350 | 85.4            | 0.224 | -3.9%                                               | -15.0% |
| Cystatin C                          | NephroTest <sup>15</sup> | 313 | 76.4            | 0.257 | -13.1%                                              | -28.7% |
|                                     | Steno <sup>16-18</sup>   | 245 | 94.7            | 0.198 | 1.3%                                                | -5.5%  |
|                                     | RASS <sup>13</sup>       | 211 | 97.6            | 0.175 | -1.4%                                               | -7.5%  |
|                                     | Grubb <sup>19</sup>      | 350 | 81.1            | 0.265 | -8.7%                                               | -36.0% |
| Creatinine-cystatin C               | NephroTest <sup>15</sup> | 313 | 87.9            | 0.200 | ref                                                 | ref    |
|                                     | Steno <sup>16-18</sup>   | 245 | 93.5            | 0.188 | ref                                                 | ref    |
|                                     | RASS <sup>13</sup>       | 211 | 99.1            | 0.162 | ref                                                 | ref    |
|                                     | Grubb <sup>19</sup>      | 350 | 88.9            | 0.194 | ref                                                 | ref    |

Dark gray shading indicates that the P<sub>30</sub> or RMSE for the creatinine-cystatin C equation is 5% or better than the creatinine or cystatin C equations

Light gray shading indicates that the P<sub>30</sub> or RMSE for the creatinine-cystatin C equation is 0.1-5% better than the creatinine or cystatin C equations

RMSE, root mean square error; P<sub>30</sub>, percentage of estimates within 30% of measured GFR; RASS, RASS, Renin Angiotensin System Study;

**Table S12: Reclassification of People with Measured GFR of Greater and Lower than 60 ml/min per 1.73 m<sup>2</sup> Using Estimated GFR Computed from the Creatinine to the Creatinine-Cystatin C equation across Subgroups in the Validation Dataset**

| Group           | Number<br>(percent) | mGFR < 60 ml/min/1.73 m <sup>2</sup>                        |                                                               |     | mGFR ≥ 60 ml/min/1.73 m <sup>2</sup>                        |                                                               |      | NRI<br>(95% CI),<br>p-value |
|-----------------|---------------------|-------------------------------------------------------------|---------------------------------------------------------------|-----|-------------------------------------------------------------|---------------------------------------------------------------|------|-----------------------------|
|                 |                     | Number (percent)                                            |                                                               | Net | Number (percent)                                            |                                                               | Net  |                             |
|                 |                     | Correct<br><i>eGFRcr</i> ≥ 60 and<br><i>eGFRcr-cys</i> < 60 | Incorrect<br><i>eGFRcr</i> < 60 and<br><i>eGFRcr-cys</i> ≥ 60 |     | Correct<br><i>eGFRcr</i> < 60 and<br><i>eGFRcr-cys</i> ≥ 60 | Incorrect<br><i>eGFRcr</i> ≥ 60 and<br><i>eGFRcr-cys</i> < 60 |      |                             |
| <b>Age</b>      |                     |                                                             |                                                               |     |                                                             |                                                               |      |                             |
| < 40            | 357 (32)            | 3 (4.1)                                                     | 2 (2.7)                                                       | 1.4 | 9 (3.2)                                                     | 2 (0.7)                                                       | 2.5  | 3.8 (-2.5-10.2)<br>0.24     |
| 40-65           | 530 (47)            | 8 (2.9)                                                     | 5 (1.8)                                                       | 1.1 | 17 (6.6)                                                    | 4 (1.6)                                                       | 5.0  | 6.1 (1.8-10.5)<br>0.01      |
| >65             | 232 (21)            | 6 (3.2)                                                     | 1 (0.5)                                                       | 2.7 | 2 (4.4)                                                     | 3 (6.7)                                                       | -2.2 | 0.5 (-9.7-10.6)<br>0.93     |
| <b>Sex</b>      |                     |                                                             |                                                               |     |                                                             |                                                               |      |                             |
| Female          | 456 (41)            | 5 (2.6)                                                     | 4 (2.0)                                                       | 0.5 | 10 (3.8)                                                    | 5 (1.9)                                                       | 1.9  | 2.4 (-1.8-6.6)<br>0.26      |
| Male            | 663 (59)            | 12 (3.6)                                                    | 4 (1.2)                                                       | 2.4 | 18 (5.5)                                                    | 4 (1.2)                                                       | 4.3  | 6.7 (3.0-10.3)<br><0.001    |
| <b>Diabetes</b> |                     |                                                             |                                                               |     |                                                             |                                                               |      |                             |
| Yes             | 594 (53)            | 7 (3.4)                                                     | 1 (0.5)                                                       | 2.9 | 11 (2.8)                                                    | 4 (1.0)                                                       | 1.8  | 4.7 (1.4-8.1)<br>0.01       |
| No              | 525 (47)            | 10 (3.0)                                                    | 7 (2.1)                                                       | 0.9 | 17 (8.6)                                                    | 5 (2.5)                                                       | 6.1  | 7.0 (1.7-12.3)<br>0.01      |
| <b>BMI</b>      |                     |                                                             |                                                               |     |                                                             |                                                               |      |                             |
| < 20            | 81 (7)              | 6 (13.0)                                                    | 3 (6.5)                                                       | 6.5 | 1 (2.9)                                                     | 1 (2.9)                                                       | 0.0  | 6.5 (-8.5-21.6)<br>0.40     |
| 20-25           | 503 (45)            | 8 (3.7)                                                     | 3 (1.4)                                                       | 2.3 | 11 (3.8)                                                    | 6 (2.1)                                                       | 1.7  | 4.1 (-0.1-8.2)<br>0.05      |
| 25-30           | 386 (35)            | 3 (1.6)                                                     | 2 (1.1)                                                       | 0.5 | 13 (6.6)                                                    | 2 (1.0)                                                       | 5.6  | 6.1 (1.6-10.6)<br>0.01      |
| >30             | 149 (13)            | 0 (0.0)                                                     | 0 (0.0)                                                       | 0.0 | 3 (4.6)                                                     | 0 (0.0)                                                       | 4.6  | 4.6 (-1.0-9.7)<br>0.08      |

mGFR, measured GFR. eGFRcr, estimated GFR from creatinine; eGFRcr-cys, estimated GFR from creatinine and cystatin C; NRI, net reclassification index; BMI, body mass index. Units of age are years and units of BMI are kg/m<sup>2</sup>.



**Table S13: Reclassification of Measured GFR Above and Below Different Thresholds Using Estimated GFR Computed from the Creatinine to the Creatinine-Cystatin C equation in the Validation Dataset**

| Measured GFR Threshold, $ml/min/1.73 m^2$ | Number (percent) | mGFR < threshold $ml/min/1.73 m^2$                                                 |                                                                                      |     | mGFR $\geq$ threshold $ml/min/1.73 m^2$                   |                                                                                      |      | NRI (95% CI) p-value   |
|-------------------------------------------|------------------|------------------------------------------------------------------------------------|--------------------------------------------------------------------------------------|-----|-----------------------------------------------------------|--------------------------------------------------------------------------------------|------|------------------------|
|                                           |                  | Correct<br><i>eGFRcr <math>\geq</math> threshold and eGFRcr-cys &lt; threshold</i> | Incorrect<br><i>eGFRcr &lt; threshold and eGFRcr-cys <math>\geq</math> threshold</i> | Net | Correct<br><i>eGFR cr-cys <math>\geq</math> threshold</i> | Incorrect<br><i>eGFRcr <math>\geq</math> threshold and eGFRcr-cys &lt; threshold</i> | Net  |                        |
| >90                                       | 1119 (100)       | 21 (2.8)                                                                           | 6 (0.8)                                                                              | 2.0 | 27 (7.3)                                                  | 24 (6.5)                                                                             | 0.8  | 2.8 (-1.2-6.8)<br>0.17 |
| 75                                        | 1119 (100)       | 16 (2.5)                                                                           | 5 (0.8)                                                                              | 1.7 | 25 (5.3)                                                  | 18 (3.8)                                                                             | 1.5  | 3.2 (0-6.3)<br>0.04    |
| 45                                        | 1119 (100)       | 16 (4.0)                                                                           | 5 (1.2)                                                                              | 2.7 | 12 (1.7)                                                  | 13 (1.8)                                                                             | -0.1 | 2.6 (0-5.2)<br>0.05    |
| 30                                        | 1119 (100)       | 12 (5.5)                                                                           | 2 (0.9)                                                                              | 4.6 | 17 (1.9)                                                  | 14 (1.6)                                                                             | 0.3  | 4.9 (1.4-8.5)<br>0.01  |
| <15                                       | 1119 (100)       | 2 (3.9)                                                                            | 1 (2.0)                                                                              | 2.0 | 8 (0.7)                                                   | 2 (0.2)                                                                              | 0.6  | 2.5 (-4.2-9.2)<br>0.46 |

mGFR, measured GFR. eGFRcr, estimated GFR from creatinine; eGFRcr-cys, estimated GFR from creatinine and cystatin C; NRI, net reclassification index.

## Supplemental References

1. Inker LA, Eckfeldt J, Levey AS, et al. Expressing the CKD-EPI (Chronic Kidney Disease Epidemiology Collaboration) Cystatin C Equations for Estimating GFR With Standardized Serum Cystatin C Values. *Am J Kidney Dis* 2011;58:682-4.
2. Stevens LA, Coresh J, Schmid CH, et al. Estimating GFR using serum cystatin C alone and in combination with serum creatinine: a pooled analysis of 3,418 individuals with CKD. *Am J Kidney Dis* 2008;51:395-406.
3. Levey AS, Stevens LA, Schmid CH, et al. A new equation to estimate glomerular filtration rate. *Ann Intern Med* 2009;150:604-12.
4. Levey AS, Coresh J, Greene T, et al. Using standardized serum creatinine values in the modification of diet in renal disease study equation for estimating glomerular filtration rate. *Ann Intern Med* 2006;145:247-54.
5. Lewis EJ, Hunsicker LG, Clarke WR, et al. Renoprotective effect of the angiotensin-receptor antagonist irbesartan in patients with nephropathy due to type 2 diabetes. *New England Journal Medicine* 2001;345:851-60.
6. Ibrahim H, Mondress M, Tello A, Fan Y, Koopmeiners J, Thomas W. An alternative formula to the Cockcroft-Gault and the modification of diet in renal diseases formulas in predicting GFR in individuals with type 1 diabetes. *J Am Soc Nephrol* 2005;16:1051-60.
7. Lewis EJ, Hunsicker LG, Bain RP, Rohde RD. The effect of angiotensin-converting-enzyme inhibition on diabetic nephropathy. The Collaborative Study Group. *New England Journal Medicine* 1993;329:1456-62.
8. Feldman HI, Appel LJ, Chertow GM, et al. The Chronic Renal Insufficiency Cohort (CRIC) Study: Design and methods. *J Am Soc Nephrol* 2003;14:S148-53.
9. Poggio ED, Wang X, Greene T, Van Lente F, Hall PM. Performance of the modification of diet in renal disease and Cockcroft-Gault equations in the estimation of GFR in health and in chronic kidney disease. *J Am Soc Nephrol* 2005;16:459-66.
10. Rule AD, Larson TS, Bergstralh EJ, Slezak JM, Jacobsen SJ, Cosio FG. Using serum creatinine to estimate glomerular filtration rate: accuracy in good health and in chronic kidney disease. *Ann Intern Med* 2004;141:929-37.
11. Bosma RJ, Doorenbos CR, Stegeman CA, van der Heide JJ, Navis G. Predictive performance of renal function equations in renal transplant recipients: an analysis of patient factors in bias. *Am J Transplant* 2005;5:2193-203.
12. Rook M, Hofker HS, van Son WJ, van der Heide J, Ploeg R, Navis G. Predictive capacity of pre-donation GFR and renal reserve capacity for donor renal function after living kidney donation. *Am J Trans* 2006;6:1653-9.
13. Mauer M, Drummond K. The early natural history of nephropathy in type 1 diabetes: I. Study design and baseline characteristics of the study participants. *Diabetes* 2002;51:1572-9.
14. Chapman AB, Guay-Woodford LM, Grantham JJ, et al. Renal structure in early autosomal-dominant polycystic kidney disease (ADPKD): The Consortium for Radiologic Imaging Studies of Polycystic Kidney Disease (CRISP) cohort. *Kidney Int* 2003;64:1035-45.
15. Froissart M, Rossert J, Jacquot C, Paillard M, Houillier P. Predictive performance of the modification of diet in renal disease and Cockcroft-Gault equations for estimating renal function. *J Am Soc Nephrol* 2005;16:763-73.
16. Jacobsen P, Andersen S, Rossing K, Jensen BR, Parving HH. Dual blockade of the renin-angiotensin system versus maximal recommended dose of ACE inhibition in diabetic nephropathy. *Kidney Int* 2003;63:1874-80.

17. Mathiesen ER, Hommel E, Giese J, Parving HH. Efficacy of captopril in postponing nephropathy in normotensive insulin dependent diabetic patients with microalbuminuria. *Brit Med J* 1991;303:81-7.
18. Tarnow L, Rossing P, Jensen C, Hansen BV, Parving HH. Long-term renoprotective effect of nisoldipine and lisinopril in type 1 diabetic patients with diabetic nephropathy. *Diabetes Care* 2000;23:1725-30.
19. Grubb A, Nyman U, Bjork J, et al. Simple cystatin C-based prediction equations for glomerular filtration rate compared with the modification of diet in renal disease prediction equation for adults and the Schwartz and the Counahan-Barratt prediction equations for children. *Clin Chem* 2005;51:1420-31.
